# Supplementary material
Source: publisher figshare collection journal article supplement (https://geolsoc.figshare.com/ndownloader/files/34179919)
Supplement: Supplementary file 1 [file 34179919]

#NEXUS
BEGIN TREES;

	UTREE 1 = (Amphimedon_queenslandica: 7.565970, (Trichoplax_adhaerens: 7.070640, (Acropora_digitifera: 6.426533, ((Ciona_intestinalis: 5.622889, (Danio_rerio: 4.354057, (Mus_musculus: 0.807579, Homo_sapiens: 0.807579) [&95%={0.621177, 1.30682}]: 3.546478) [&95%={4.21306, 4.53208}]: 1.268832) [&95%={5.20498, 6.06938}]: 0.666434, ((Brachionus_sp: 5.963932, ((Crassostrea_gigas: 5.390584, (Lottia_gigantea: 4.935425, Aplysia_californica: 4.935425) [&95%={4.714, 5.21752}]: 0.455158) [&95%={5.3227, 5.48564}]: 0.335154, (Alvinella_pompejana: 5.067259, (Helobdella_robusta: 4.381955, Capitella_telata: 4.381955) [&95%={3.26746, 5.12067}]: 0.685304) [&95%={4.78022, 5.50656}]: 0.658479) [&95%={5.51861, 5.94496}]: 0.238194) [&95%={5.747, 6.14921}]: 0.214853, ((Armorloricus_elegans: 5.770549, ((Meiopriapulus_sp: 4.338089, (Priapulus_caudatus: 0.694892, Halicryptus_spinulosus: 0.694892) [&95%={0.219612, 1.81611}]: 3.643197) [&95%={3.17788, 5.24687}]: 1.109091, (Pycnophyes_kielensis: 3.971049, (Echinoderes_sp: 1.290461, Echinoderes_horni: 1.290461) [&95%={0.369624, 2.90849}]: 2.680589) [&95%={2.51559, 5.027}]: 1.476131) [&95%={5.18563, 5.80887}]: 0.323369) [&95%={5.42472, 6.04087}]: 0.305804, (((Gordius_sp: 3.485539, Nectonema_munidae: 3.485539) [&95%={2.07026, 4.84164}]: 1.772823, ((Xiphinema_index: 3.537825, (Trichuris_muris: 2.217627, Trichinella_spiralis: 2.217627) [&95%={1.10137, 3.42381}]: 1.320198) [&95%={2.50725, 4.51627}]: 0.841754, ((Pristionchus_pacificus: 1.980992, Caenorhabditis_elegans: 1.980992) [&95%={1.33547, 2.98924}]: 1.031877, (Brugia_malayi: 1.953289, Ascaris_sum: 1.953289) [&95%={0.895772, 3.19981}]: 1.059580) [&95%={2.11219, 4.04663}]: 1.366710) [&95%={3.46332, 5.12748}]: 0.878783) [&95%={4.55831, 5.74637}]: 0.719854, ((Epiperipatus_sp: 2.257835, (Peripatus_sp: 0.620596, Euperipatoides_kanagrensis: 0.620596) [&95%={0.198506, 1.46366}]: 1.637239) [&95%={1.45387, 3.96397}]: 3.609092, (((Actinarctus_doryphorus: 3.331847, (Echiniscus_testudo: 0.729810, Echiniscus_bisetosus: 0.729810) [&95%={0.246564, 1.70559}]: 2.602037) [&95%={1.98358, 4.45166}]: 1.442741, (Milnesium_tardigradum: 3.605838, (Richtersius_coronifer: 2.501633, (Ramazzottius_varieornatus: 1.850867, Hypsibius_dujardini: 1.850867) [&95%={0.781338, 3.14637}]: 0.650766) [&95%={1.35665, 3.69921}]: 1.104204) [&95%={2.42392, 4.56471}]: 1.168751) [&95%={3.85363, 5.40288}]: 1.019331, (((Pycnogonum_sp: 4.545788, Anoplodactylus_eroticus: 4.545788) [&95%={4.30642, 5.02302}]: 0.900225, (Limulus_polyphemus: 5.120871, ((Siro_boyerae: 4.225986, Ixodes_scapularis: 4.225986) [&95%={3.0888, 4.8286}]: 0.610186, (Chaerilus_celebensis: 4.541322, (Acanthoscurria_gomesiana: 3.453806, Neoscona_arabesca: 3.453806) [&95%={3.00543, 4.17814}]: 1.087516) [&95%={4.35924, 4.86437}]: 0.294850) [&95%={4.56376, 5.11461}]: 0.284700) [&95%={5.0094, 5.34026}]: 0.325142) [&95%={5.23873, 5.66463}]: 0.203717, (((Scutigera_coleoptrata: 4.625830, (Strigamia_maritima: 4.029411, Lithobius_fortificatus: 4.029411) [&95%={3.8334, 4.44966}]: 0.596419) [&95%={4.22837, 5.07485}]: 0.504821, ((Prostemmiulus_sp: 3.324578, Polydesmus_angustus: 3.324578) [&95%={1.71735, 4.40342}]: 1.282514, (Polyxenus_lagurus: 4.093315, Glomeridesmus_sp: 4.093315) [&95%={3.0978, 4.77703}]: 0.513777) [&95%={4.26584, 5.07382}]: 0.523558) [&95%={4.78542, 5.44863}]: 0.398154, ((Meganyctiphanes_norvegica: 3.082899, (Petrolisthes_cinctipes: 2.161240, Litopenaeus_vannamaei: 2.161240) [&95%={0.892014, 3.62804}]: 0.921660) [&95%={1.62525, 4.41146}]: 2.210328, ((Xibalbanus_tumulensis: 4.605380, (Tigriopus_japonicus: 2.852251, Eurytemora_affinis: 2.852251) [&95%={1.48146, 3.96396}]: 1.753130) [&95%={3.86592, 5.09985}]: 0.505787, ((Artemia_francisca: 4.287336, (Daphnia_magna: 0.582600, Daphnia_pulex: 0.582600) [&95%={0.18251, 1.53752}]: 3.704736) [&95%={4.05843, 4.71306}]: 0.677307, (Folsomia_candida: 4.738944, (Meinertellus_cundinamarcensis: 4.462129, ((Ephemera_danica: 3.678970, Calopteryx_splendens: 3.678970) [&95%={3.23014, 4.17917}]: 0.517720, ((Tetrix_subulata: 3.516319, (Peruphasma_schultei: 3.078796, (Periplaneta_americana: 2.109931, Mantis_religiosa: 2.109931) [&95%={1.34371, 3.0563}]: 0.968866) [&95%={2.16994, 3.65112}]: 0.437523) [&95%={3.21708, 3.94541}]: 0.458663, (Cercopis_vulnerata: 3.815633, ((Gynaikothrips_ficorum: 2.925885, Nasonia_sp: 2.925885) [&95%={1.7858, 3.5119}]: 0.691620, ((Platycentropus_radiatus: 2.465612, Parides_euridedes: 2.465612) [&95%={2.03823, 3.058}]: 0.917923, (Tribolium_castaneum: 3.153007, Eurelon_nostras: 3.153007) [&95%={3.07133, 3.3529}]: 0.230529) [&95%={3.19461, 3.64788}]: 0.233969) [&95%={3.37069, 3.89519}]: 0.198128) [&95%={3.54976, 4.08311}]: 0.159349) [&95%={3.70092, 4.2625}]: 0.221708) [&95%={3.90123, 4.51491}]: 0.265439) [&95%={4.15246, 4.78461}]: 0.276815) [&95%={4.43427, 5.04012}]: 0.225699) [&95%={4.7061, 5.23902}]: 0.146524) [&95%={4.87069, 5.36722}]: 0.182061) [&95%={5.14854, 5.50943}]: 0.235576) [&95%={5.34976, 5.72401}]: 0.120927) [&95%={5.47944, 5.83252}]: 0.144189) [&95%={5.62863, 5.96319}]: 0.073008) [&95%={5.7038, 6.03094}]: 0.111289) [&95%={5.82252, 6.12775}]: 0.098137) [&95%={5.9305, 6.21201}]: 0.102432) [&95%={6.04542, 6.29731}]: 0.110539) [&95%={6.16719, 6.38692}]: 0.137210) [&95%={6.32869, 6.56148}]: 0.644107) [&95%={6.58211, 7.88652}]: 0.495329) [&95%={6.74333, 8.35615}];

END;
